# Supplementary material for: Development of a gut microbiota model for the analysis of bacterial modifications of xenobiotics
Source: Research Square preprint supplement (doi:10.21203/rs.3.rs-8136690/v1), 2025-12-05
Supplement: Supplementary file 1 [file f8b6675c0cfd3ca76b9572d0.docx]

**Supplementary Material**

**Development of a gut microbiota model for the analysis of bacterial modifications of xenobiotics**

**Natalie Hager1, Jan-Lorenz Weyers1, Laura Falk2, Marie Christine Simon3, Waldemar Seel3, Jean-Lou Christian Michel Dorne4, Uwe Deppenmeier1***

1) Institute of Microbiology and Biotechnology, University of Bonn, Meckenheimer Allee 168, 53115 Bonn, Germany

2) Institute for Food Chemistry, University of Bonn, Friedrich‑Hirzebruch‑Allee 7, 53115 Bonn, Germany

3) Institute for Nutrition and Microbiota, University of Bonn, Katzenburgweg 7, 53115 Bonn, Germany

4) Methodology and Scientific Support Unit, European Food Safety Authority (EFSA), Via Carlo Magno 1A, 43126 Parma, Italy

***Corresponding author:** Uwe Deppenmeier; Institute of Microbiology and Biotechnology, University of Bonn, Meckenheimer Allee 168, 53115 Bonn, Germany; E-mail: udeppen@uni-bonn.de; Tel. +49-228-735590; Fax +49-228-737576; <http://www.ifmb.uni-bonn.de/forschung/math.-nat.-fakultaet/ag-prof.-deppenmeier>

**Supplementary methods**

***S1. Supplementary methods for xenobiotic transformation assays***

To evaluate microbial xenobiotic metabolism under defined conditions, incubations were conducted using model substrates representing major biotransformation classes: 4-acetoxyacetanilide (ester hydrolysis), sulindac (sulfoxide reduction), sulfasalazine (azo bond reduction), and nitrendipine (nitro group reduction). Reaction mixtures were prepared under anaerobic conditions (37 °C, 24 h) as follows: (i) 210 µL SHIME® saline containing the fiber-rich substrate formulation with 1 g L-1 mucin, pectin, and xylan (substrate control), (ii) 150 µL pooled fecal suspension (three individual pools with n = 3 donors each, 1:10 diluted in SHIME® saline) + 60 µL fiber-rich substrate, (iii) 300 µL pooled exoenzyme fraction (three individual pools with n = 3 donors each, 1:10 in SHIME® saline), and (iv) 150 µL bacterial colon model + 60 µL fiber-rich substrate. All incubations contained 500 µM of the respective test compound. At defined time points, samples were mixed 1:1 (v/v) with ethanol, vortexed, and centrifuged (18 000 × g, 3 min). The resulting supernatant was combined 1:1 (v/v) with acetonitrile (100 %) and centrifuged again.

The clarified supernatant was diluted with the mobile phase prior to injection. Non-polar and UV-absorbing compounds were analyzed on a Knauer Eurospher II C8 column (250 × 4 mm, 5 µm) with a C8 guard cartridge using an AZURA CT 2 system (Knauer, Berlin, Germany) equipped with a SpectraSystem SCM1000 degasser, P4000 pump, AS3000 autosampler, and UVD 2.1L detector. Paracetamol was analyzed on a Shodex Asahipak NH2P-50 3E column (Showa Denko, Japan) with a corresponding guard column and an RI-101 detector (Ercatech AG, Germany). Chromatographic parameters, including mobile-phase composition, column temperature, flow rate, and detection wavelength are summarized in Suppl. Tab. S1. Quantification of parent compounds and metabolites was performed by external calibration using analytical reference standards.

**Table S1: Chromatographic conditions for HPLC-based detection of selected xenobiotics and their microbial transformation products.** Analytes were separated on either C8 or amino columns under compound-specific conditions. Mobile phases consisted of acetonitrile (AcN) with acidic modifiers and were operated under isocratic flow. Detection wavelengths correspond to the absorbance maxima of each compound.

|  | Column | Mobile phase | Tempera-ture [°C] | Flow rate [ml min-1] | UV detection [nm] |
| --- | --- | --- | --- | --- | --- |
| Sulindac | C8 | 40 % ACN + 0.1 % H3PO4 | 40 | 0.5 | 340 |
| Sulindac sulfide | C8 | 40 % ACN + 0.1 % H3PO4 | 40 | 0.5 | 340 |
| Sulfasalazin | C8 | 40 % ACN + 0.1 % H3PO4 | 40 | 0.5 | 340 |
| Sulfapyridine | C8 | 15 % ACN + 0.1 % HCOOH | 40 | 0.5 | 265 |
| 4-Acetoxyacetanilide | C8 | 40 % ACN | 40 | 0.5 | 254 |
| Paracetamol | Amino | 65 % ACN | 60 | 0.5 | 240 |
| Nitrendipine | C8 | 60 % ACN | 40 | 0.5 | 254 |

To confirm the identity of selected biotransformation products, representative samples were analyzed by liquid chromatography-mass spectrometry (LC-MS). Samples were mixed 1:1 (v/v) with ethanol and centrifuged (18 000 × g, 5 min). From the resulting supernatant, 50 µL were diluted in 450 µL acetonitrile (100%), vortexed (30 s), and centrifuged again (9 000 × g, 10 min). The supernatant was evaporated under reduced pressure (30 °C, 150 → 75 mbar) and reconstituted in 200 µL H₂O:AcN (70:30, v/v). Samples were filtered through 0.2 µm RC syringe filters and transferred to LC vials. LC-MS analyses were performed using a Waters UPLC VION QTOF system operated in ESI⁺/ESI⁻ mode with a Waters ACQUITY UPLC HSS T3 C18 column. A binary mobile-phase system (water/acetonitrile) was used for separation, and data were acquired in full-scan mode (15 min run time). Calibration was conducted in water using analytical standards to confirm retention times and accurate masses.

***S2. Supplementary dataset from 16S rRNA gene amplicon sequencing (Fig. 2)***

**Table S2: Genus-level hit counts from 16S rRNA gene amplicon sequencing of the bacterial colon model under different substrate conditions.** Taxonomic assignments are based on high-quality reads after denoising and chimera removal (DADA2, Q ≥ 30). Only taxa with valid genus-level classification (“OK hits”) are included. BS = Bile salts.

| Hits | No Substrate T0 n=2 T24 n=3 | | | | | Fiber-Rich T0 n=2 T24 n=3 | | | | | Western + BS T0 n=2 T24 n=3 | | | | | Western - BS T0 n=2 T24 n=3 | | | | |
| --- | --- | --- | --- | --- | --- | --- | --- | --- | --- | --- | --- | --- | --- | --- | --- | --- | --- | --- | --- | --- |
| n=1 | n=2 | n=1 | n=2 | n=3 | n=1 | n=2 | n=1 | n=2 | n=3 | n=1 | n=2 | n=1 | n=2 | n=3 | n=1 | n=2 | n=1 | n=2 | n=3 |
| Bacteroides | 21970 | 9986 | 9948 | 9986 | 6810 | 10626 | 14124 | 9948 | 9986 | 6810 | 17233 | 14699 | 8766 | 7780 | 15898 | 13725 | 13016 | 26191 | 13484 | 18174 |
| Bacteria | 0 | 0 | 0 | 0 | 0 | 0 | 0 | 0 | 0 | 0 | 0 | 2 | 0 | 5 | 9 | 11 | 0 | 0 | 0 | 0 |
| Enterobacteriaceae | 0 | 0 | 19 | 0 | 8 | 0 | 0 | 19 | 0 | 8 | 0 | 0 | 620 | 372 | 915 | 0 | 0 | 68 | 15 | 37 |
| Ruminococcaceae | 207 | 418 | 449 | 418 | 311 | 97 | 108 | 449 | 418 | 311 | 138 | 99 | 123 | 104 | 238 | 67 | 100 | 389 | 395 | 480 |
| Peptococcaceae | 7 | 0 | 0 | 0 | 0 | 0 | 11 | 0 | 0 | 0 | 6 | 8 | 2 | 0 | 0 | 0 | 3 | 0 | 2 | 0 |
| Lachnospiraceae_FCS020 | 322 | 352 | 381 | 352 | 241 | 135 | 179 | 381 | 352 | 241 | 234 | 197 | 141 | 87 | 229 | 156 | 158 | 132 | 153 | 166 |
| DTU014 | 5 | 10 | 9 | 10 | 2 | 0 | 0 | 9 | 10 | 2 | 0 | 0 | 0 | 0 | 0 | 0 | 4 | 2 | 0 | 0 |
| RF39 | 57 | 114 | 100 | 114 | 83 | 26 | 25 | 100 | 114 | 83 | 34 | 23 | 50 | 23 | 102 | 20 | 20 | 42 | 27 | 44 |
| Faecalibacterium | 22775 | 6462 | 6291 | 6462 | 4338 | 9849 | 13102 | 6291 | 6462 | 4338 | 14914 | 12728 | 3413 | 2215 | 5306 | 10992 | 11517 | 7522 | 6509 | 6690 |
| Blautia | 16152 | 13518 | 14182 | 13518 | 8952 | 6513 | 9132 | 14182 | 13518 | 8952 | 11558 | 8776 | 7369 | 5043 | 14912 | 6586 | 7785 | 7488 | 5419 | 6804 |
| Dorea | 1955 | 1941 | 2028 | 1941 | 1307 | 777 | 1031 | 2028 | 1941 | 1307 | 1258 | 1073 | 785 | 507 | 1506 | 653 | 990 | 965 | 700 | 948 |
| [Bacteroides]_pectinophilus | 30 | 39 | 44 | 39 | 11 | 20 | 15 | 44 | 39 | 11 | 17 | 13 | 9 | 0 | 10 | 13 | 11 | 16 | 6 | 16 |
| Fournierella | 37 | 123 | 135 | 123 | 94 | 0 | 0 | 135 | 123 | 94 | 36 | 33 | 0 | 9 | 45 | 37 | 28 | 92 | 150 | 161 |
| Ruminococcaceae | 110 | 128 | 119 | 128 | 104 | 51 | 66 | 119 | 128 | 104 | 66 | 62 | 35 | 0 | 66 | 52 | 67 | 71 | 57 | 57 |
| Acetanaerobacterium | 3 | 3 | 0 | 3 | 0 | 0 | 0 | 0 | 3 | 0 | 0 | 0 | 0 | 0 | 0 | 0 | 0 | 0 | 0 | 0 |
| Lachnospira | 1062 | 712 | 775 | 712 | 469 | 425 | 610 | 775 | 712 | 469 | 706 | 597 | 190 | 119 | 381 | 518 | 571 | 353 | 337 | 333 |
| [Eubacterium]_eligens | 1205 | 1184 | 1224 | 1184 | 818 | 495 | 676 | 1224 | 1184 | 818 | 803 | 643 | 713 | 524 | 1496 | 654 | 604 | 1032 | 717 | 901 |
| Lachnospiraceae | 2124 | 1791 | 1980 | 1791 | 1171 | 986 | 1155 | 1980 | 1791 | 1171 | 1377 | 1197 | 693 | 585 | 1591 | 918 | 1012 | 920 | 696 | 1015 |
| Lachnospiraceae_ND3007 | 4574 | 3618 | 3769 | 3618 | 2594 | 2046 | 2588 | 3769 | 3618 | 2594 | 3017 | 2740 | 1691 | 1177 | 3360 | 2532 | 2361 | 1987 | 1464 | 1476 |
| Sutterella | 1876 | 622 | 558 | 622 | 430 | 925 | 1185 | 558 | 622 | 430 | 1416 | 1315 | 1067 | 798 | 2229 | 1146 | 1152 | 1185 | 2085 | 1189 |
| Ruminococcus | 2115 | 1635 | 1420 | 1635 | 1197 | 988 | 1188 | 1420 | 1635 | 1197 | 1192 | 1015 | 324 | 271 | 609 | 896 | 1080 | 502 | 526 | 467 |
| Lachnospiraceae | 0 | 0 | 0 | 0 | 0 | 0 | 2 | 0 | 0 | 0 | 0 | 0 | 0 | 0 | 0 | 0 | 0 | 0 | 0 | 0 |
| [Eubacterium]_nodatum | 0 | 0 | 11 | 0 | 0 | 0 | 3 | 11 | 0 | 0 | 0 | 9 | 0 | 0 | 0 | 0 | 0 | 0 | 9 | 12 |
| Anaerovoracaceae | 175 | 168 | 150 | 168 | 151 | 43 | 67 | 150 | 168 | 151 | 98 | 76 | 44 | 27 | 88 | 72 | 65 | 212 | 114 | 160 |
| Lachnospiraceae | 526 | 649 | 712 | 649 | 396 | 212 | 324 | 712 | 649 | 396 | 319 | 302 | 197 | 179 | 538 | 190 | 217 | 296 | 375 | 404 |
| Romboutsia | 77 | 56 | 64 | 56 | 38 | 40 | 38 | 64 | 56 | 38 | 33 | 39 | 55 | 26 | 98 | 43 | 33 | 38 | 34 | 29 |
| Intestinibacter | 44 | 38 | 29 | 38 | 12 | 20 | 26 | 29 | 38 | 12 | 25 | 21 | 17 | 4 | 25 | 15 | 24 | 16 | 16 | 20 |
| Terrisporobacter | 17 | 13 | 16 | 13 | 8 | 0 | 1 | 16 | 13 | 8 | 9 | 0 | 15 | 11 | 21 | 0 | 0 | 0 | 8 | 11 |
| Eubacterium coprostanoligenes | 877 | 1325 | 1274 | 1325 | 838 | 387 | 555 | 1274 | 1325 | 838 | 638 | 594 | 556 | 407 | 1193 | 383 | 496 | 745 | 658 | 666 |
| Lachnoclostridium | 1630 | 2062 | 2085 | 2062 | 1428 | 654 | 932 | 2085 | 2062 | 1428 | 1110 | 936 | 2265 | 1602 | 4353 | 820 | 863 | 1928 | 1241 | 1926 |
| Lachnospiraceae_UCG003 | 17 | 15 | 14 | 15 | 0 | 5 | 10 | 14 | 15 | 0 | 12 | 12 | 0 | 0 | 8 | 9 | 18 | 7 | 7 | 8 |
| Agathobacter | 8962 | 7007 | 7545 | 7007 | 4624 | 3756 | 4905 | 7545 | 7007 | 4624 | 6025 | 5107 | 3133 | 2188 | 6196 | 4300 | 4401 | 3784 | 2993 | 3666 |
| Actinomyces | 0 | 8 | 8 | 8 | 0 | 0 | 0 | 8 | 8 | 0 | 5 | 0 | 0 | 5 | 8 | 0 | 0 | 2 | 0 | 4 |
| Citrobacter | 0 | 8 | 35 | 8 | 11 | 0 | 0 | 35 | 8 | 11 | 0 | 0 | 62 | 41 | 137 | 0 | 0 | 20 | 0 | 0 |
| Enterobacter | 8 | 0 | 9 | 0 | 0 | 0 | 0 | 9 | 0 | 0 | 6 | 9 | 345 | 213 | 446 | 0 | 10 | 59 | 27 | 36 |
| Escherichia-Shigella | 48 | 141 | 129 | 141 | 104 | 34 | 41 | 129 | 141 | 104 | 51 | 36 | 3540 | 3374 | 5846 | 33 | 39 | 6139 | 1003 | 3099 |
| [Eubacterium]_hallii_group | 3690 | 4537 | 4786 | 4537 | 3074 | 1593 | 2076 | 4786 | 4537 | 3074 | 2325 | 2081 | 4344 | 2723 | 8367 | 1939 | 1912 | 4808 | 3579 | 4462 |
| Klebsiella | 0 | 18 | 12 | 18 | 8 | 0 | 0 | 12 | 18 | 8 | 0 | 0 | 1795 | 1008 | 2709 | 0 | 0 | 92 | 7 | 56 |
| Bifidobacterium | 3047 | 3242 | 3400 | 3242 | 2474 | 1563 | 1828 | 3400 | 3242 | 2474 | 1861 | 1575 | 3356 | 2464 | 6601 | 1710 | 1653 | 3909 | 2765 | 2933 |
| Phascolarctobacterium | 1029 | 817 | 900 | 817 | 631 | 549 | 697 | 900 | 817 | 631 | 1381 | 1174 | 2297 | 1715 | 3922 | 772 | 722 | 1745 | 982 | 1316 |
| Kocuria | 0 | 0 | 4 | 0 | 0 | 0 | 0 | 4 | 0 | 0 | 0 | 0 | 0 | 0 | 0 | 0 | 0 | 0 | 0 | 0 |
| Anaerovoracaceae | 56 | 64 | 58 | 64 | 43 | 39 | 40 | 58 | 64 | 43 | 38 | 27 | 38 | 21 | 66 | 34 | 34 | 65 | 51 | 47 |
| Clostridia | 0 | 0 | 0 | 0 | 0 | 0 | 0 | 0 | 0 | 0 | 0 | 0 | 0 | 0 | 0 | 0 | 0 | 2 | 0 | 0 |
| Lachnospiraceae_UCG010 | 97 | 123 | 157 | 123 | 80 | 41 | 55 | 157 | 123 | 80 | 52 | 57 | 0 | 0 | 0 | 43 | 49 | 350 | 285 | 332 |
| GCA-900066755 | 0 | 10 | 0 | 10 | 0 | 0 | 0 | 0 | 10 | 0 | 0 | 0 | 0 | 0 | 11 | 0 | 0 | 6 | 0 | 5 |
| Tyzzerella | 52 | 38 | 39 | 38 | 26 | 29 | 34 | 39 | 38 | 26 | 30 | 25 | 18 | 11 | 26 | 23 | 31 | 88 | 77 | 81 |
| UCG-009 | 4 | 0 | 6 | 0 | 0 | 0 | 0 | 6 | 0 | 0 | 0 | 0 | 0 | 0 | 0 | 0 | 0 | 0 | 0 | 0 |
| Lachnospiraceae NK4A136 | 1267 | 1127 | 1308 | 1127 | 804 | 516 | 684 | 1308 | 1127 | 804 | 809 | 690 | 100 | 79 | 259 | 426 | 508 | 405 | 474 | 475 |
| Lachnospiraceae UCG001 | 920 | 525 | 531 | 525 | 308 | 383 | 532 | 531 | 525 | 308 | 628 | 548 | 149 | 118 | 303 | 496 | 397 | 211 | 114 | 180 |
| Megasphaera | 515 | 486 | 473 | 486 | 350 | 288 | 391 | 473 | 486 | 350 | 423 | 381 | 1824 | 1280 | 3719 | 372 | 353 | 434 | 325 | 341 |
| Lachnospiraceae_NK4B4 | 54 | 24 | 24 | 24 | 22 | 18 | 26 | 24 | 24 | 22 | 35 | 12 | 0 | 0 | 8 | 28 | 20 | 11 | 11 | 10 |
| Butyricicoccus | 401 | 346 | 336 | 346 | 209 | 176 | 248 | 336 | 346 | 209 | 279 | 235 | 155 | 103 | 274 | 207 | 194 | 203 | 198 | 199 |
| Erysipelotrichaceae UCG003 | 1652 | 1482 | 1483 | 1482 | 1131 | 829 | 1110 | 1483 | 1482 | 1131 | 1135 | 975 | 767 | 713 | 1869 | 938 | 909 | 1041 | 726 | 852 |
| Clostridium_sensu _1 | 27 | 12 | 5 | 12 | 8 | 13 | 8 | 5 | 12 | 8 | 7 | 14 | 16 | 11 | 26 | 4 | 11 | 11 | 4 | 21 |
| Paludicola | 0 | 0 | 0 | 0 | 0 | 0 | 0 | 0 | 0 | 0 | 0 | 0 | 0 | 0 | 0 | 0 | 0 | 0 | 3 | 0 |
| Finegoldia | 3 | 0 | 0 | 0 | 0 | 0 | 0 | 0 | 0 | 0 | 0 | 0 | 0 | 0 | 0 | 0 | 0 | 0 | 0 | 0 |
| Coprococcus | 1629 | 2190 | 2411 | 2190 | 1496 | 690 | 960 | 2411 | 2190 | 1496 | 1065 | 958 | 583 | 503 | 1549 | 752 | 811 | 3075 | 1998 | 2834 |
| Flavonifractor | 117 | 191 | 160 | 191 | 96 | 68 | 87 | 160 | 191 | 96 | 72 | 67 | 42 | 16 | 126 | 67 | 73 | 98 | 101 | 82 |
| [Eubacterium]_ventriosum | 284 | 211 | 206 | 211 | 113 | 100 | 159 | 206 | 211 | 113 | 172 | 175 | 96 | 63 | 165 | 134 | 120 | 128 | 82 | 104 |
| GCA-900066575 | 58 | 36 | 42 | 36 | 34 | 20 | 34 | 42 | 36 | 34 | 32 | 38 | 11 | 0 | 18 | 37 | 42 | 21 | 15 | 24 |
| Lactonifactor | 6 | 12 | 12 | 12 | 11 | 0 | 7 | 12 | 12 | 11 | 0 | 0 | 0 | 0 | 11 | 0 | 0 | 0 | 0 | 0 |
| Frisingicoccus | 7 | 39 | 47 | 39 | 32 | 4 | 0 | 47 | 39 | 32 | 0 | 4 | 0 | 0 | 9 | 0 | 0 | 18 | 14 | 28 |
| Catenibacillus | 0 | 4 | 0 | 4 | 0 | 0 | 0 | 0 | 4 | 0 | 0 | 0 | 0 | 0 | 5 | 0 | 0 | 0 | 0 | 0 |
| Subdoligranulum | 4288 | 4387 | 4442 | 4387 | 3024 | 1885 | 2544 | 4442 | 4387 | 3024 | 2673 | 2436 | 3320 | 2214 | 6639 | 2338 | 2308 | 4029 | 3204 | 3443 |
| [Eubacterium]_fissicatena | 13 | 5 | 7 | 5 | 0 | 11 | 8 | 7 | 5 | 0 | 0 | 2 | 0 | 0 | 0 | 5 | 4 | 0 | 0 | 0 |
| CHKCI001 | 0 | 0 | 0 | 0 | 0 | 0 | 0 | 0 | 0 | 0 | 3 | 0 | 0 | 0 | 0 | 0 | 0 | 0 | 0 | 0 |
| Roseburia | 3314 | 1560 | 1590 | 1560 | 967 | 1276 | 1668 | 1590 | 1560 | 967 | 2204 | 1698 | 267 | 214 | 610 | 1559 | 1529 | 974 | 879 | 1013 |
| [Ruminococcus]_torques | 1791 | 1731 | 1825 | 1731 | 1112 | 827 | 1026 | 1825 | 1731 | 1112 | 1190 | 976 | 785 | 547 | 1576 | 775 | 882 | 657 | 502 | 792 |
| [Ruminococcus]_gauvreauii | 895 | 695 | 708 | 695 | 427 | 338 | 454 | 708 | 695 | 427 | 558 | 508 | 258 | 127 | 297 | 341 | 425 | 55 | 149 | 132 |
| Marvinbryantia | 115 | 75 | 81 | 75 | 44 | 23 | 52 | 81 | 75 | 44 | 72 | 45 | 69 | 43 | 147 | 57 | 62 | 67 | 54 | 99 |
| CAG-56 | 329 | 284 | 310 | 284 | 155 | 118 | 167 | 310 | 284 | 155 | 194 | 166 | 30 | 14 | 70 | 134 | 154 | 49 | 76 | 59 |
| Shuttleworthia | 7 | 10 | 0 | 10 | 7 | 0 | 8 | 0 | 10 | 7 | 5 | 0 | 13 | 0 | 10 | 16 | 0 | 8 | 0 | 0 |
| Oscillospirales | 0 | 6 | 4 | 6 | 2 | 0 | 0 | 4 | 6 | 2 | 0 | 0 | 0 | 0 | 0 | 7 | 0 | 3 | 3 | 0 |
| Fusicatenibacter | 6840 | 4688 | 4979 | 4688 | 3134 | 2816 | 3559 | 4979 | 4688 | 3134 | 4772 | 3958 | 1218 | 932 | 2190 | 3023 | 3364 | 1664 | 1238 | 1759 |
| Fenollaria | 0 | 0 | 0 | 0 | 2 | 0 | 0 | 0 | 0 | 2 | 0 | 0 | 0 | 0 | 0 | 0 | 0 | 0 | 0 | 0 |
| [Ruminococcus]_gnavus | 178 | 96 | 96 | 96 | 78 | 69 | 81 | 96 | 96 | 78 | 98 | 89 | 11 | 14 | 18 | 50 | 71 | 27 | 40 | 41 |
| Christensenellaceae_R-7 | 948 | 1270 | 1289 | 1270 | 882 | 478 | 563 | 1289 | 1270 | 882 | 757 | 612 | 650 | 613 | 1523 | 461 | 478 | 1058 | 659 | 835 |
| Candidatus_Soleaferrea | 12 | 25 | 18 | 25 | 11 | 6 | 4 | 18 | 25 | 11 | 3 | 9 | 0 | 0 | 14 | 5 | 0 | 5 | 7 | 19 |
| Anaerostipes | 1711 | 1795 | 2028 | 1795 | 1227 | 775 | 958 | 2028 | 1795 | 1227 | 1177 | 1048 | 1642 | 1041 | 3319 | 903 | 866 | 1164 | 874 | 969 |
| Eisenbergiella | 5 | 8 | 11 | 8 | 0 | 0 | 6 | 11 | 8 | 0 | 0 | 0 | 10 | 20 | 60 | 0 | 0 | 28 | 13 | 23 |
| Lachnospiraceae UCG008 | 0 | 0 | 6 | 0 | 0 | 0 | 0 | 6 | 0 | 0 | 0 | 0 | 0 | 0 | 0 | 0 | 0 | 0 | 0 | 0 |
| Eubacterium xylanophilum | 416 | 45 | 42 | 45 | 34 | 165 | 249 | 42 | 45 | 34 | 277 | 268 | 9 | 7 | 14 | 215 | 179 | 25 | 18 | 17 |
| [Eubacterium]_ruminantium | 374 | 447 | 488 | 447 | 300 | 149 | 231 | 488 | 447 | 300 | 190 | 169 | 45 | 45 | 94 | 128 | 172 | 241 | 235 | 226 |
| Moryella | 23 | 26 | 41 | 26 | 22 | 13 | 27 | 41 | 26 | 22 | 17 | 12 | 10 | 9 | 33 | 15 | 13 | 16 | 20 | 35 |
| UBA1819 | 28 | 29 | 18 | 29 | 20 | 11 | 10 | 18 | 29 | 20 | 22 | 14 | 0 | 6 | 39 | 12 | 17 | 26 | 21 | 14 |
| Lachnospiraceae_NC2004 | 0 | 0 | 0 | 0 | 0 | 0 | 0 | 0 | 0 | 0 | 0 | 0 | 2 | 0 | 0 | 0 | 0 | 2 | 0 | 0 |
| Enterorhabdus | 0 | 3 | 11 | 3 | 5 | 0 | 0 | 11 | 3 | 5 | 7 | 0 | 6 | 5 | 12 | 6 | 4 | 0 | 8 | 5 |
| Defluviitaleaceae UCG011 | 25 | 37 | 61 | 37 | 25 | 9 | 18 | 61 | 37 | 25 | 9 | 5 | 9 | 0 | 11 | 13 | 13 | 16 | 22 | 15 |
| Oscillibacter | 211 | 212 | 209 | 212 | 171 | 87 | 118 | 209 | 212 | 171 | 176 | 107 | 138 | 94 | 257 | 113 | 102 | 157 | 118 | 126 |
| Clostridia_UCG-014 | 423 | 582 | 569 | 582 | 375 | 207 | 239 | 569 | 582 | 375 | 313 | 248 | 218 | 157 | 504 | 244 | 178 | 335 | 233 | 259 |
| Desulfovibrionaceae | 2 | 3 | 4 | 3 | 0 | 3 | 3 | 4 | 3 | 0 | 4 | 0 | 0 | 0 | 3 | 4 | 0 | 6 | 0 | 2 |
| Desulfovibrio | 8 | 12 | 7 | 12 | 6 | 4 | 8 | 7 | 12 | 6 | 5 | 10 | 20 | 13 | 18 | 7 | 4 | 7 | 16 | 9 |
| Bilophila | 207 | 227 | 231 | 227 | 169 | 128 | 134 | 231 | 227 | 169 | 163 | 121 | 204 | 165 | 397 | 127 | 104 | 239 | 158 | 167 |
| Anaerofustis | 5 | 3 | 0 | 3 | 0 | 2 | 4 | 0 | 3 | 0 | 0 | 3 | 0 | 0 | 0 | 8 | 2 | 0 | 3 | 7 |
| UCG-008 | 26 | 15 | 21 | 15 | 7 | 18 | 12 | 21 | 15 | 7 | 8 | 6 | 20 | 6 | 20 | 12 | 6 | 18 | 10 | 9 |
| Monoglobus | 516 | 405 | 388 | 405 | 282 | 256 | 293 | 388 | 405 | 282 | 414 | 362 | 115 | 77 | 216 | 301 | 327 | 203 | 244 | 193 |
| Haemophilus | 16 | 6 | 11 | 6 | 7 | 8 | 10 | 11 | 6 | 7 | 15 | 13 | 0 | 0 | 0 | 4 | 9 | 4 | 0 | 4 |
| Desulfovibrionaceae | 3 | 10 | 4 | 10 | 3 | 0 | 3 | 4 | 10 | 3 | 3 | 0 | 5 | 4 | 5 | 6 | 0 | 0 | 0 | 3 |
| Fusobacterium | 332 | 79 | 75 | 79 | 45 | 173 | 282 | 75 | 79 | 45 | 257 | 228 | 1875 | 1431 | 3667 | 244 | 186 | 700 | 159 | 472 |
| Marmoricola | 0 | 0 | 0 | 0 | 0 | 0 | 0 | 0 | 0 | 0 | 0 | 0 | 0 | 0 | 0 | 0 | 0 | 0 | 0 | 0 |
| Novosphingobium | 0 | 4 | 0 | 4 | 0 | 0 | 0 | 0 | 4 | 0 | 0 | 0 | 0 | 0 | 0 | 0 | 0 | 0 | 0 | 0 |
| Sphingomonadaceae | 0 | 0 | 0 | 0 | 0 | 0 | 0 | 0 | 0 | 0 | 0 | 0 | 0 | 0 | 9 | 0 | 0 | 0 | 0 | 0 |
| Pseudomonas | 4 | 0 | 0 | 0 | 0 | 0 | 0 | 0 | 0 | 0 | 0 | 0 | 0 | 0 | 0 | 0 | 0 | 0 | 0 | 0 |
| Hungatella | 0 | 26 | 47 | 26 | 27 | 0 | 0 | 47 | 26 | 27 | 0 | 0 | 101 | 78 | 252 | 0 | 0 | 54 | 27 | 55 |
| Roseomonas | 0 | 0 | 0 | 0 | 0 | 0 | 0 | 0 | 0 | 0 | 0 | 0 | 0 | 0 | 3 | 0 | 0 | 0 | 0 | 0 |
| Methylobacterium | 0 | 0 | 0 | 0 | 0 | 0 | 0 | 0 | 0 | 0 | 0 | 0 | 0 | 0 | 5 | 0 | 0 | 0 | 0 | 0 |
| Enhydrobacter | 2 | 0 | 4 | 0 | 0 | 0 | 0 | 4 | 0 | 0 | 0 | 0 | 0 | 0 | 0 | 0 | 0 | 0 | 0 | 0 |
| Johnsonella | 0 | 0 | 2 | 0 | 0 | 0 | 0 | 2 | 0 | 0 | 0 | 0 | 0 | 0 | 0 | 0 | 0 | 0 | 0 | 0 |
| Clostridia_vadinBB60 | 34 | 72 | 60 | 72 | 48 | 13 | 17 | 60 | 72 | 48 | 16 | 6 | 0 | 0 | 0 | 10 | 13 | 32 | 54 | 38 |
| Acinetobacter | 0 | 0 | 0 | 0 | 0 | 0 | 0 | 0 | 0 | 0 | 0 | 0 | 0 | 0 | 0 | 0 | 0 | 0 | 2 | 0 |
| UCG-010 | 37 | 78 | 61 | 78 | 36 | 13 | 21 | 61 | 78 | 36 | 34 | 27 | 6 | 4 | 25 | 22 | 20 | 26 | 32 | 19 |
| Oscillospira | 18 | 16 | 18 | 16 | 8 | 5 | 24 | 18 | 16 | 8 | 19 | 18 | 8 | 0 | 12 | 11 | 8 | 10 | 10 | 15 |
| Oscillospiraceae | 39 | 37 | 27 | 37 | 27 | 15 | 15 | 27 | 37 | 27 | 23 | 36 | 28 | 29 | 75 | 24 | 16 | 102 | 64 | 69 |
| Rhodospirillales | 31 | 9 | 14 | 9 | 6 | 14 | 21 | 14 | 9 | 6 | 20 | 23 | 3 | 0 | 0 | 20 | 15 | 7 | 6 | 0 |
| Oscillospiraceae | 252 | 230 | 236 | 230 | 146 | 110 | 137 | 236 | 230 | 146 | 154 | 149 | 85 | 42 | 160 | 130 | 109 | 164 | 150 | 112 |
| Intestinimonas | 27 | 46 | 64 | 46 | 42 | 6 | 22 | 64 | 46 | 42 | 23 | 16 | 6 | 15 | 11 | 10 | 6 | 44 | 20 | 28 |
| NK4A214_group | 433 | 638 | 598 | 638 | 388 | 222 | 294 | 598 | 638 | 388 | 401 | 329 | 170 | 144 | 368 | 298 | 311 | 603 | 365 | 461 |
| Christensenellaceae | 14 | 22 | 22 | 22 | 9 | 6 | 13 | 22 | 22 | 9 | 10 | 0 | 0 | 0 | 11 | 5 | 15 | 10 | 4 | 14 |
| UCG-002 | 1958 | 3107 | 3019 | 3107 | 2175 | 916 | 1116 | 3019 | 3107 | 2175 | 1127 | 972 | 993 | 809 | 2119 | 959 | 1066 | 2566 | 1867 | 2302 |
| UCG-003 | 708 | 794 | 828 | 794 | 557 | 381 | 391 | 828 | 794 | 557 | 525 | 410 | 432 | 345 | 671 | 322 | 421 | 614 | 357 | 439 |
| Eubacterium oxidoreducen | 0 | 0 | 0 | 0 | 0 | 0 | 0 | 0 | 0 | 0 | 0 | 0 | 0 | 0 | 0 | 2 | 0 | 0 | 0 | 0 |
| Colidextribacter | 340 | 285 | 246 | 285 | 174 | 143 | 212 | 246 | 285 | 174 | 193 | 153 | 73 | 39 | 146 | 161 | 189 | 159 | 160 | 137 |
| Megamonas | 1553 | 1672 | 1620 | 1672 | 1217 | 811 | 1045 | 1620 | 1672 | 1217 | 1069 | 899 | 1588 | 1094 | 2862 | 1033 | 845 | 1445 | 1016 | 1140 |
| Pseudoflavonifractor | 8 | 0 | 15 | 0 | 9 | 0 | 6 | 15 | 0 | 9 | 0 | 0 | 7 | 6 | 0 | 0 | 0 | 0 | 5 | 7 |
| UCG-005 | 433 | 627 | 644 | 627 | 422 | 214 | 250 | 644 | 627 | 422 | 288 | 217 | 168 | 115 | 364 | 229 | 229 | 277 | 310 | 278 |
| Christensenella | 4 | 0 | 0 | 0 | 0 | 0 | 0 | 0 | 0 | 0 | 0 | 0 | 0 | 0 | 0 | 0 | 0 | 3 | 0 | 0 |
| Papillibacter | 6 | 0 | 0 | 0 | 0 | 0 | 0 | 0 | 0 | 0 | 0 | 0 | 0 | 0 | 5 | 0 | 0 | 0 | 0 | 0 |
| Akkermansia | 197 | 244 | 170 | 244 | 172 | 91 | 137 | 170 | 244 | 172 | 156 | 93 | 525 | 488 | 861 | 123 | 106 | 780 | 264 | 473 |
| Cloacibacillus | 0 | 0 | 0 | 0 | 0 | 0 | 0 | 0 | 0 | 0 | 0 | 0 | 0 | 2 | 0 | 0 | 0 | 0 | 0 | 0 |
| Lachnospiraceae UCG004 | 183 | 163 | 200 | 163 | 120 | 57 | 93 | 200 | 163 | 120 | 104 | 104 | 130 | 103 | 219 | 106 | 90 | 112 | 76 | 136 |
| Prevotella | 719 | 118 | 122 | 118 | 34 | 364 | 509 | 122 | 118 | 34 | 522 | 444 | 23 | 39 | 123 | 539 | 497 | 134 | 26 | 63 |
| Muribaculaceae | 106 | 31 | 38 | 31 | 32 | 58 | 61 | 38 | 31 | 32 | 85 | 74 | 0 | 5 | 3 | 59 | 47 | 9 | 16 | 9 |
| Odoribacter | 199 | 137 | 148 | 137 | 135 | 88 | 118 | 148 | 137 | 135 | 144 | 138 | 72 | 58 | 161 | 149 | 121 | 192 | 113 | 105 |
| Alistipes | 1400 | 5148 | 4893 | 5148 | 3881 | 727 | 884 | 4893 | 5148 | 3881 | 1058 | 917 | 5613 | 4296 | 11486 | 968 | 863 | 3252 | 1604 | 2229 |
| Barnesiella | 307 | 394 | 381 | 394 | 258 | 157 | 192 | 381 | 394 | 258 | 197 | 196 | 168 | 140 | 336 | 201 | 180 | 480 | 321 | 366 |
| Parabacteroides | 1454 | 1095 | 1170 | 1095 | 743 | 698 | 889 | 1170 | 1095 | 743 | 1176 | 980 | 3237 | 2696 | 6627 | 955 | 913 | 3107 | 1205 | 1877 |
| Coprobacter | 31 | 9 | 0 | 9 | 5 | 25 | 35 | 0 | 9 | 5 | 25 | 29 | 4 | 0 | 0 | 36 | 26 | 8 | 0 | 0 |
| Holdemania | 43 | 36 | 29 | 36 | 24 | 17 | 14 | 29 | 36 | 24 | 19 | 18 | 12 | 7 | 27 | 14 | 15 | 36 | 22 | 11 |
| Butyricimonas | 66 | 106 | 114 | 106 | 68 | 32 | 24 | 114 | 106 | 68 | 59 | 38 | 128 | 80 | 205 | 41 | 32 | 156 | 68 | 88 |
| Barnesiellaceae | 5 | 0 | 0 | 0 | 0 | 0 | 0 | 0 | 0 | 0 | 0 | 0 | 0 | 2 | 0 | 0 | 0 | 3 | 0 | 0 |
| Sanguibacteroides | 4 | 12 | 13 | 12 | 6 | 2 | 4 | 13 | 12 | 6 | 0 | 0 | 17 | 17 | 19 | 3 | 0 | 13 | 2 | 8 |
| Rikenella | 0 | 3 | 0 | 3 | 0 | 0 | 0 | 0 | 3 | 0 | 0 | 0 | 0 | 0 | 0 | 0 | 0 | 0 | 0 | 0 |
| Paraprevotella | 263 | 47 | 35 | 47 | 42 | 122 | 174 | 35 | 47 | 42 | 184 | 139 | 12 | 0 | 27 | 156 | 164 | 29 | 61 | 20 |
| Puniceicoccaceae | 14 | 17 | 36 | 17 | 20 | 9 | 9 | 36 | 17 | 20 | 8 | 9 | 37 | 23 | 69 | 9 | 6 | 56 | 24 | 30 |
| Rhodobacteraceae | 0 | 3 | 0 | 3 | 0 | 0 | 0 | 0 | 3 | 0 | 0 | 0 | 0 | 0 | 0 | 0 | 0 | 0 | 0 | 0 |
| Paracoccus | 0 | 0 | 0 | 0 | 0 | 0 | 0 | 0 | 0 | 0 | 0 | 0 | 0 | 0 | 0 | 0 | 0 | 2 | 0 | 0 |
| Lactobacillus | 24 | 30 | 34 | 30 | 39 | 24 | 14 | 34 | 30 | 39 | 29 | 27 | 36 | 19 | 51 | 21 | 21 | 29 | 19 | 23 |
| Allisonella | 5 | 0 | 0 | 0 | 0 | 5 | 2 | 0 | 0 | 0 | 0 | 5 | 25 | 10 | 43 | 4 | 5 | 7 | 0 | 0 |
| Acidaminococcus | 17 | 32 | 30 | 32 | 15 | 12 | 16 | 30 | 32 | 15 | 28 | 30 | 0 | 0 | 10 | 24 | 17 | 12 | 10 | 0 |
| Veillonella | 23 | 13 | 38 | 13 | 24 | 22 | 17 | 38 | 13 | 24 | 28 | 16 | 55 | 42 | 146 | 19 | 12 | 86 | 27 | 54 |
| Granulicatella | 0 | 0 | 0 | 0 | 2 | 0 | 0 | 0 | 0 | 2 | 0 | 0 | 0 | 0 | 2 | 0 | 0 | 0 | 0 | 0 |
| Dialister | 241 | 204 | 227 | 204 | 123 | 133 | 148 | 227 | 204 | 123 | 199 | 188 | 195 | 141 | 342 | 144 | 137 | 165 | 158 | 160 |
| Peptococcus | 5 | 7 | 11 | 7 | 4 | 3 | 0 | 11 | 7 | 4 | 4 | 7 | 0 | 0 | 5 | 0 | 5 | 5 | 0 | 9 |
| Lactococcus | 5 | 3 | 3 | 3 | 0 | 0 | 0 | 3 | 3 | 0 | 0 | 7 | 3 | 0 | 0 | 0 | 5 | 4 | 3 | 5 |
| Streptococcus | 76 | 50 | 56 | 50 | 45 | 40 | 38 | 56 | 50 | 45 | 46 | 55 | 76 | 51 | 113 | 41 | 47 | 57 | 33 | 40 |
| Turicibacter | 35 | 38 | 27 | 38 | 22 | 16 | 29 | 27 | 38 | 22 | 35 | 29 | 53 | 25 | 81 | 27 | 30 | 39 | 24 | 25 |
| Paenibacillaceae | 3 | 0 | 0 | 0 | 0 | 0 | 0 | 0 | 0 | 0 | 0 | 0 | 0 | 0 | 0 | 0 | 0 | 0 | 0 | 0 |
| [Eubacterium]_brachy | 5 | 4 | 9 | 4 | 5 | 3 | 0 | 9 | 4 | 5 | 3 | 0 | 2 | 0 | 3 | 4 | 4 | 4 | 0 | 0 |
| Olsenella | 0 | 8 | 0 | 8 | 0 | 0 | 0 | 0 | 8 | 0 | 0 | 0 | 0 | 0 | 0 | 0 | 0 | 3 | 0 | 0 |
| Collinsella | 2169 | 1690 | 1684 | 1690 | 1229 | 1089 | 1339 | 1684 | 1690 | 1229 | 1451 | 1282 | 805 | 596 | 1706 | 1251 | 1191 | 1128 | 845 | 875 |
| Enorma | 4 | 5 | 0 | 5 | 0 | 0 | 0 | 0 | 5 | 0 | 0 | 0 | 5 | 6 | 8 | 0 | 0 | 0 | 0 | 0 |
| Victivallis | 0 | 0 | 0 | 0 | 0 | 0 | 0 | 0 | 0 | 0 | 0 | 0 | 0 | 0 | 0 | 2 | 4 | 0 | 0 | 0 |
| Mastigocladopsis PC10914 | 0 | 0 | 0 | 0 | 0 | 0 | 0 | 0 | 0 | 0 | 0 | 0 | 0 | 0 | 0 | 0 | 0 | 0 | 0 | 0 |
| Chloroplast | 3 | 16 | 0 | 16 | 0 | 0 | 0 | 0 | 16 | 0 | 0 | 0 | 0 | 0 | 0 | 0 | 0 | 0 | 0 | 2 |
| Anaeroplasma | 13 | 10 | 11 | 10 | 3 | 3 | 4 | 11 | 10 | 3 | 11 | 10 | 0 | 0 | 0 | 12 | 3 | 0 | 0 | 0 |
| Erysipelatoclostridium | 63 | 42 | 48 | 42 | 20 | 10 | 26 | 48 | 42 | 20 | 22 | 16 | 26 | 11 | 47 | 28 | 19 | 30 | 16 | 16 |
| Izemoplasmatales | 0 | 22 | 13 | 22 | 14 | 0 | 3 | 13 | 22 | 14 | 4 | 4 | 0 | 0 | 0 | 3 | 7 | 0 | 0 | 4 |
| Erysipelatoclostridiaceae | 0 | 6 | 0 | 6 | 6 | 0 | 4 | 0 | 6 | 6 | 5 | 0 | 0 | 0 | 0 | 0 | 8 | 0 | 0 | 0 |
| Dielma | 0 | 0 | 0 | 0 | 0 | 0 | 0 | 0 | 0 | 0 | 0 | 0 | 0 | 0 | 0 | 0 | 0 | 0 | 0 | 0 |
| [Clostridium]_innocuum | 0 | 5 | 5 | 5 | 0 | 1 | 0 | 5 | 5 | 0 | 5 | 0 | 3 | 0 | 7 | 4 | 6 | 6 | 10 | 3 |
| Merdibacter | 4 | 0 | 4 | 0 | 8 | 0 | 5 | 4 | 0 | 8 | 8 | 0 | 0 | 3 | 6 | 5 | 3 | 6 | 0 | 0 |
| Holdemanella | 732 | 544 | 561 | 544 | 380 | 364 | 442 | 561 | 544 | 380 | 611 | 534 | 208 | 139 | 368 | 465 | 413 | 324 | 223 | 219 |
| Erysipelotrichaceae | 0 | 0 | 0 | 0 | 0 | 0 | 0 | 0 | 0 | 0 | 0 | 0 | 0 | 0 | 0 | 5 | 0 | 0 | 0 | 0 |
| Faecalitalea | 33 | 38 | 34 | 38 | 18 | 7 | 19 | 34 | 38 | 18 | 24 | 16 | 21 | 15 | 34 | 14 | 15 | 24 | 14 | 20 |
| Anaerococcus | 3 | 0 | 0 | 0 | 0 | 0 | 0 | 0 | 0 | 0 | 0 | 0 | 0 | 0 | 0 | 0 | 0 | 0 | 0 | 0 |
| Coriobacteriales | 12 | 9 | 0 | 9 | 0 | 5 | 3 | 0 | 9 | 0 | 6 | 4 | 3 | 0 | 7 | 4 | 8 | 4 | 6 | 0 |
| Eggerthellaceae | 0 | 13 | 0 | 13 | 0 | 0 | 0 | 0 | 13 | 0 | 7 | 0 | 7 | 3 | 10 | 5 | 3 | 13 | 69 | 31 |
| Adlercreutzia | 29 | 53 | 71 | 53 | 41 | 31 | 42 | 71 | 53 | 41 | 29 | 26 | 41 | 34 | 90 | 25 | 20 | 53 | 52 | 50 |
| Eggerthellaceae | 26 | 46 | 29 | 46 | 33 | 9 | 13 | 29 | 46 | 33 | 19 | 25 | 31 | 16 | 58 | 24 | 24 | 19 | 19 | 23 |
| Coriobacteriales | 0 | 2 | 0 | 2 | 0 | 0 | 0 | 0 | 2 | 0 | 0 | 0 | 0 | 0 | 0 | 0 | 0 | 0 | 0 | 0 |
| Senegalimassilia | 52 | 48 | 50 | 48 | 47 | 23 | 20 | 50 | 48 | 47 | 46 | 21 | 41 | 32 | 77 | 28 | 31 | 53 | 29 | 29 |
| Eggerthella | 42 | 47 | 48 | 47 | 40 | 15 | 23 | 48 | 47 | 40 | 25 | 22 | 54 | 29 | 96 | 30 | 20 | 50 | 61 | 34 |
| Slackia | 0 | 2 | 4 | 2 | 0 | 6 | 5 | 4 | 2 | 0 | 4 | 3 | 0 | 0 | 4 | 8 | 9 | 0 | 0 | 3 |
| Gordonibacter | 29 | 27 | 18 | 27 | 18 | 12 | 13 | 18 | 27 | 18 | 11 | 11 | 27 | 15 | 63 | 14 | 16 | 42 | 153 | 65 |
| Delftia | 0 | 0 | 3 | 0 | 2 | 0 | 0 | 3 | 0 | 2 | 0 | 0 | 0 | 0 | 4 | 0 | 2 | 0 | 0 | 0 |
| Parasutterella | 37 | 49 | 51 | 49 | 36 | 21 | 33 | 51 | 49 | 36 | 29 | 30 | 68 | 58 | 141 | 19 | 18 | 79 | 61 | 70 |
| Oxalobacter | 6 | 11 | 10 | 11 | 9 | 0 | 9 | 10 | 11 | 9 | 11 | 11 | 12 | 16 | 21 | 10 | 0 | 12 | 12 | 14 |
| Herbaspirillum | 0 | 0 | 0 | 0 | 0 | 0 | 0 | 0 | 0 | 0 | 698 | 627 | 84 | 81 | 268 | 646 | 670 | 85 | 98 | 58 |
| Burkholderia-Caballeronia | 0 | 0 | 0 | 0 | 0 | 0 | 0 | 0 | 0 | 0 | 160 | 102 | 30 | 21 | 90 | 101 | 101 | 131 | 87 | 129 |
| Oxalobacteraceae | 0 | 0 | 0 | 0 | 2 | 0 | 0 | 0 | 0 | 2 | 0 | 0 | 0 | 0 | 0 | 0 | 0 | 0 | 0 | 0 |
| vadinBE97 | 0 | 7 | 0 | 7 | 0 | 0 | 0 | 0 | 7 | 0 | 0 | 3 | 8 | 3 | 20 | 3 | 0 | 12 | 3 | 5 |
| UCG-004 | 5 | 0 | 0 | 0 | 0 | 0 | 0 | 0 | 0 | 0 | 0 | 0 | 0 | 0 | 0 | 2 | 0 | 0 | 0 | 0 |
| Erysipelatoclostridiaceae | 0 | 0 | 5 | 0 | 0 | 0 | 2 | 5 | 0 | 0 | 2 | 0 | 0 | 0 | 0 | 0 | 0 | 0 | 0 | 0 |
| Incertae_Sedis | 318 | 290 | 309 | 290 | 185 | 128 | 177 | 309 | 290 | 185 | 224 | 179 | 170 | 88 | 363 | 162 | 135 | 227 | 150 | 163 |
| Caproiciproducens | 0 | 5 | 7 | 5 | 0 | 0 | 0 | 7 | 5 | 0 | 0 | 0 | 0 | 0 | 0 | 0 | 0 | 0 | 0 | 0 |
| Anaerotruncus | 0 | 0 | 9 | 0 | 0 | 4 | 0 | 9 | 0 | 0 | 4 | 3 | 0 | 0 | 0 | 0 | 0 | 0 | 0 | 0 |
| Negativibacillus | 54 | 44 | 36 | 44 | 35 | 9 | 18 | 36 | 44 | 35 | 40 | 29 | 14 | 19 | 47 | 23 | 29 | 19 | 14 | 31 |
| Phocea | 11 | 7 | 4 | 7 | 4 | 4 | 4 | 4 | 7 | 4 | 0 | 7 | 0 | 0 | 4 | 8 | 5 | 0 | 6 | 0 |
| DTU089 | 10 | 14 | 16 | 14 | 4 | 0 | 4 | 16 | 14 | 4 | 6 | 3 | 3 | 2 | 10 | 14 | 5 | 11 | 5 | 6 |
| Oscillospirales | 0 | 0 | 0 | 0 | 0 | 0 | 0 | 0 | 0 | 0 | 2 | 0 | 0 | 0 | 0 | 0 | 0 | 0 | 0 | 0 |
| Anaerofilum | 0 | 0 | 6 | 0 | 0 | 0 | 0 | 6 | 0 | 0 | 0 | 0 | 0 | 0 | 0 | 0 | 0 | 0 | 0 | 0 |
| CAG-352 | 1067 | 1445 | 1388 | 1445 | 1091 | 487 | 620 | 1388 | 1445 | 1091 | 690 | 593 | 521 | 386 | 997 | 490 | 491 | 723 | 629 | 656 |
| [Eubacterium]_siraeum | 238 | 104 | 88 | 104 | 56 | 90 | 125 | 88 | 104 | 56 | 151 | 113 | 16 | 11 | 34 | 116 | 104 | 58 | 40 | 31 |

***S3 Supplementary statistical analysis (Fig. 2)***

To quantitatively evaluate the compositional trends shown in Fig. 2, a statistical analysis (ΔT24-T0) was performed for all bacterial genera under each substrate condition to determine which composition most effectively preserved the original microbial community structure. For each genus, the condition with the smallest absolute deviation from baseline was identified, and group-level differences were statistically tested using the Kruskal-Wallis test. Among all tested conditions, the fiber-rich medium minimized compositional drift most reliably, being identified as the best-performing condition in 11 out of 34 genera, with statistical significance (p < 0.05) in 91% of those cases. By contrast, the substrate-free condition showed the highest number of best-performer counts (14 genera), but with a notably lower significance rate (64%), suggesting potential contributions from background effects or low selective pressure. The Western-style substrate conditions, with or without bile salts, yielded lower frequencies (5 and 7 genera, respectively), yet achieved statistical significance in all relevant comparisons, indicating condition-specific but strong compositional effects. These results collectively demonstrate that the fiber-rich formulation provided the most robust support for microbial stability and recovery in vitro, outperforming all other tested substrate compositions in both consistency and statistical reliability. In contrast, exposure to Western-style substrates induced shifts toward a dysbiotic community profile enriched in bile-tolerant and facultative anaerobic taxa.

***S4. Supplementary Xenobiotic Biotransformation Datasets (Fig. 7)***

Two additional xenobiotics representing distinct microbial reaction pathways are provided in Supplementary Figure S1, further supporting the model’s ability to reproduce known metabolic conversions: Both compounds displayed highly similar degradation kinetics in fecal slurry and the bacterial colon model, whereas the exoenzyme fraction showed activity only for ester hydrolysis. These data further reinforce the mechanistic specificity of the system and expand the panel of validated xenobiotic transformations.

***
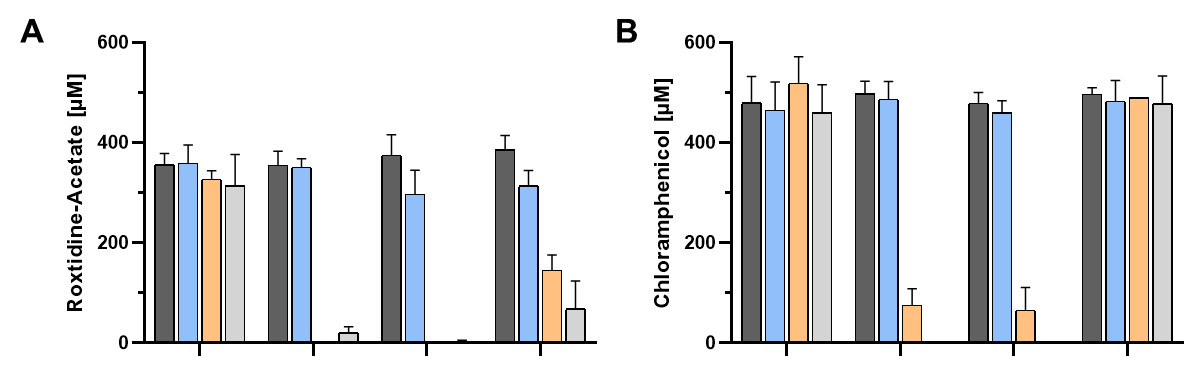
***

**Fig. S1: Microbial biotransformation of xenobiotic model compounds in buffer, fecal slurry, colon model, and the corresponding exoenzyme fraction.** Representative substrates were selected to cover different microbial transformation reactions commonly observed in the human colon: roxatitinde-acetate for ester hydrolysis (A) and chloramphenicol for nitroreduction (B). Parent-compound concentrations were quantified by HPLC at 0 h (dark grey), 0.1 h (blue), 4 h (orange), and 24 h (light grey) under anaerobic conditions (37°C). Data represent mean ± SD of three independent biological pools, each composed of three human donors.
